# Supplementary material
Source: Research Square preprint supplement (doi:10.21203/rs.3.rs-8856577/v1)
Supplement: Supplementary file 1 [file d080e8548063850f31aabe00.docx]

**Supplementary File A**

**Interview Outline**

***Work-related Questions:***

1. What advantages do you believe single employees have in the workplace compared to married employees? Can you explain your reasoning and provide an example?
2. What disadvantages do you think single employees face at work compared to married employees? Why? Can you provide an example? (Exclude factors like future marriage plans.)
3. In what ways do you think the characteristics of single employees might influence their work performance, both positively and negatively?
4. Do you believe that differences in marital status manifest in employees’ work behaviors, such as job performance or work ethic?
5. How would you describe the social habits of single employees? For example, do you find they are more outgoing, prefer solitude, or tend to get along well in group settings?
6. If an employee transitions from being single to married or from being married to having children, what changes do you anticipate in their work habits? What makes you think so?
7. Would you assign different tasks to team members based on their marital status? If so, could you explain your reasoning?
8. Imagine you have two employees with the same job ability and level, differing only in marital status—one is married, and the other is single. Over the next year, do you think their likelihood of staying with the company would differ? Who do you think is less likely to leave, and why?

***Non-work-related Questions:***

1. Do you think single employees experience “family life” in the same way that married employees do? If so, what do you believe their family life includes?
2. Do you think single employees have similar non-work needs as married employees? Do you believe these non-work needs warrant equal attention and consideration from supervisors?
3. How do you think single employees should balance their work and personal life? In other words, what percentage of their overall lives do you believe work should occupy? Why do you think this ratio is reasonable?
4. If you were to describe single employees in your company using a few adjectives, what would they be? Why? (Consider aspects such as work involvement, competence, and relationships with colleagues and supervisors.)

**Supplementary File B**

**Supervisors’ Stereotype of Single Employees Scale**

Please indicate the extent to which you agree with the following statements about single employees. (1= Strongly disagree, 7= Strongly agree)

***Positive Stereotypes***

1. Single employees can devote themselves fully to their work.

2. Single employees are proactive and enthusiastic about their work.

3. Single employees are career oriented.

4. Single employees are ambitious.

5. Single employees are energetic.

6. Single employees are creative.

7. Single employees are competitive.

8. Single employees can adapt to various work arrangements.

***Negative Stereotypes***

9. Single employees lack empathy.

10. Single employees lack life experience.

11. Single employees are self-centered.

12. Single employees are careless.
